# Supplementary material for: Histone and Histone Acetylation-Related Alterations of Gene Expression in Uninvolved Psoriatic Skin and Their Effects on Cell Proliferation, Differentiation, and Immune Responses
Source: Int J Mol Sci. 2023 Sep 26;24(19):14551. doi: 10.3390/ijms241914551 (PMC10572426; doi:10.3390/ijms241914551)
Supplement: Supplementary file 1 [file ijms-24-14551-s001.zip › Supplementary Table S1.xlsx]

## Sheet: histones
Canonical H1 linker histones				The dark side of histones: genomic organization and role of oncohistones in cancer Stefano Amatori https://doi.org/10.1186/s13148-021-01057-x
HIST1H1A	H1-1
HIST1H1C	H1-2
HIST1H1D	H1-3
HIST1H1E	H1-4
HIST1H1B	H1-5
HIST1H1T	H1-6
Non-canonical H1 linker histones
H1FNT	H1-7
H1FOO	H1-8
HILS1	H1-9P
H1FX	H1-10
H1-0	H1-11
Canonical H2A core histones
HIST1H2AA	H2AC1
HIST1H2AB	H2AC4
HIST1H2AE	H2AC8
HIST1H2AC	H2AC6
HIST1H2AD	H2AC7
HIST1H2AH	H2AC8
HIST1H2AJ	H2AC12
HIST1H2AG	H2AC11
HIST1H2AI	H2AC13
HIST1H2AK	H2AC15
HIST1H2AL	H2AC16
HIST1H2AM	H2AC17
HIST2H2AA	H2AC18
HIST2H2AB	H2AC21
HIST2H2AC	H2AC20
HIST3H2AA
Non-canonical H2A core histones
H2AX	H2AX
H2AZ1	H2AZ1
H2AZ2	H2AZ2
H2AB1	H2AB1
H2AB2	H2AB2
H2AB3	H2AB3
MACROH2A1	MACROH2A1
MACROH2A2	MACROH2A2
Canonical H2B core histones
HIST1H2BA	H2BC1
HIST1H2BB	H2BC3
HIST1H2BC	H2BC4
HIST1H2BE	H2BC6
HIST1H2BF	H2BC7
HIST1H2BG	H2BC8
HIST1H2BI	H2BC10
HIST1H2BD	H2BC5
HIST1H2BH	H2BC9
HIST1H2BJ	H2BC11
HIST1H2BK	H2BC12
HIST1H2BL	H2BC13
HIST1H2BM	H2BC14
HIST1H2BN	H2BC15
HIST1H2BO	H2BC17
HIST2H2BB	H2BC3
HIST2H2BC	H2BC20P
HIST2H2BD	H2BC19P
HIST2H2BE	H2BC21
HIST2H2BF	H2BC18
HIST2H2BB	H2BP2
HIST3H2BA	H2BC27P
HIST3H2BB	H2BC26
Non-canonical H2B core histones
H2BW1	H2BW1
Canonical H3 core histones
HIST1H3A	H3C1
HIST1H3B	H3C2
HIST1H3C	H3C3
HIST1H3D	H3C4
HIST1H3E	H3C5
HIST1H3F	H3C6
HIST1H3G	H3C7
HIST1H3H	H3C10
HIST1H3I	H3C11
HIST1H3J	H3C12
HIST2H3A	H3C15
HIST1H3B	H3C2
HIST1H3C	H3C3
HIST1H3D	H3C4
HIST3H3	H3-4
Non-canonical H3 core histones
H3-3A	H3-3A
H3-3B	H3-3B
CENPA	CENPA
H3F3C	H3-5
H3Y2	H3Y2
H3Y1	H3Y1
Canonical H4 core histones
HIST1H4A	H4C1
HIST1H4B	H4C2
HIST1H4C	H4C3
HIST1H4D	H4C4
HIST1H4E	H4C5
HIST1H4F	H4C6
HIST1H4G	H4C7
HIST1H4H	H4C8
HIST1H4I	H4C9
HIST1H4J	H4C11
HIST1H4K	H4C12
HIST1H4L	H4C13
HIST2H4A	H4C14
HIST2H4B	H4C15
HIST4H4	H4C16

## Sheet: histone chaperone GO
NAP1L1	histone chaperone activity GO:0140713
IPO9
VPS72
PWP1
APLF
SPTY2D1
MYD88
JDP2
ANP32E
ASF1B
PRDM12
ASF1A

## Sheet: histone chaperone
H3-H4 Histone chaperones	Histone chaperones: an escort network regulating histone traffic Leanne De Koning1,3, Armelle Corpet1,3, James E Haber2 & Genevie`ve Almouzn
NPM1
RSF1
H2A-H2B Histone chaperones
SET
NCL
CENH3-H4 Histone chaperones	Integrated analysis of H2A.Z isoforms function reveals a complex interplay in gene regulation
HJURP
H2AZ Histone chaperones
NAP1L1
NAP1L4
ANP32E
VPS72	VPS72/YL1-Mediated H2A.Z Deposition Is Required for Nuclear Reassembly after Mitosis by Daniel Moreno-Andrés

## Sheet: histone chaperone complexes
CAF1 Histone chaperone complex	Histone chaperones: an escort network regulating histone traffic Leanne De Koning
CHAF1A
CHAF1B
RBBP4
FACT Histone chaperone complex
SUPT16H
SSRP1
H3.3-H4 Histone chaperone complex	Developmental roles of histone H3 variants and their chaperones DAN FILIPESCU
ATRX
DAXX
HIRA Histone chaperone complex
HIRA
UBN1
CABIN1

## Sheet: GO histone acetilase
USP22	histone acetylationGO:0016573
MBTD1
MSL3
ING4
ACTL6B
DR1
SF3B5
SUPT7L
EP300
TAF10
MEAF6
KAT2B
SF3B3
ING5
KAT6B
KANSL1
HCFC1
CREBBP
KAT6A
VPS72
YEATS4
JADE3
LDB1
MSL1
PHF20
HAT1
TADA2B
KANSL2
PHF20L1
ING3
KANSL3
TAF7
TAF5
KAT2A
ZZZ3
ACTL6A
MSL2
MORF4L2
CRTC2
KAT5
WDR5
MECP2
TAF4
POLE3
TAF2
JADE1
SGF29
RUVBL1
TAF9
TAF12
OGT
ATXN7
KAT14
ENY2
MSL3P1
YEATS2
ATXN7L3
KAT8
TAF6
EP400
JADE2
MBD3
ACTB
MRGBP
CPA4
SUPT20H
SUPT3H
MCRS1
TADA2A
EPC2
MAP3K7
BRD8
TAF5L
TADA3
MORF4L1
RUVBL2
MBIP
EPC1
TAF6L
TRRAP
TADA1
DMAP1
msl_human
nsl_human
g-atac_human
nua4_human
tfiid-taf4bvariant_human
tfiid_human
tftc_human
saga-kat2a_human
morf1_human
moz1_human
hbo1-5.3_human
hbo1-5.2_human
hbo1-4.3_human
hbo1-4.1_human
piccolo_nua4_human
hbo1-4.2_human
hbo1-5.1_human
KAT7

## Sheet: histone acetilase
Type A HAT famylies		Epigenetics in ovarian cancer: premise, properties, and perspectives Qilian Yang
GNAT family
KAT2A
KAT2B
ELP3
CBP/CREBBP Family
CREBBP
EP300
MYST family
KAT5
KAT6A
KAT6B
KAT7
KAT8
Type B HAT famylies
HAT1
ORPHAN family		Cancers with wrong HATs: the impact of acetylation Vincenzo Di Cerbo
GTF3C4
TAF1L
TAF1
NCOA3
NCOA1
CLOCK
ATAT1

## Sheet: histone acetilase complexes
MOZ/MORF COMPLEX		The Role of Histone Protein Acetylation in Regulating Endothelial Function Zhi Fang1,2
MOZ	KAT6A
MORF	KAT6B
EAF6	MEAF6
BRPF1
BRPF2	BRD1
BRPF3
ING5
HBO1 COMPLEX
HBO1	KAT7
EAF6
JADE1
JADE2
JADE3
ING4
ING5
NSL COMPLEX
KANSL1
MOF	KAT8
KANSL2
HCF1
KANSL3
WDR5
PHF20
OGT
MCRS1
MOF-MSL COMPLEX
MOF	KAT8
MSL1
MSL2
MSL3L1
SAGA COMPLEX
TIP60 COMPLEX
GAS41
DMAP1
EPC1
KAT5
ACTB
P400
ACTL6A
TRAAP
VPS72
BRD8
MEAF6
MRGBP
MORF4L1
RUVBL1
RUVBL2
SAGA HAT MODULE		Structure of the human SAGA coactivator complex Dominik A. Herbst,
TADA2B
SGF29
KAT2A
TADA3
DUB module
ATXN7
ATXN7L3
ENY2
USP22
SPL module
SF3B3
SF3B5
SAGA CORE
SUPT3H
SUPT7L
SUPT20H
TADA1
TAF5L
TAF6L
TAF9B
TAF10
TAF12
ATAC complex		Buffering noise: KAT2A modular contributions to stabilization of transcription and cell identity in cancer and development Liliana Arede 1,
SGF29
TADA3
KAT2A
TADA2A
YEATS2
DR1
POLE3
HCFC1
DR1
ZZZ3
WDR5
MBIP
KAT14
INHAT complex
ANP32A		Regulation of Histone Acetylation and Transcription by Nuclear Protein pp32, a Subunit of the INHAT Complex* Sang-beom Seo Todd Macfar
SET

## Sheet: histone deacetilase GO
CHD3	GO:0016575
HDAC5
MTA2
HDAC8
SIRT6
HDAC6
RBBP4
MIER2
GATAD2B
MIER1
HDAC2
HDAC4
MTA1
HDAC3
HDAC1
ELK4
GATAD2A
HDAC7
SIRT2
SIRT7
RBBP7
MTA3
HDAC9
MBD3
HDAC11
SIRT1
MBD2
CHD4
SIRT4
mbd3/nurd_human
mbd2/nurd_human

## Sheet: histone deacetilase
Class I.	Epigenetics in ovarian cancer: premise, properties, and perspectives Qilian Yang,
HDAC1
HDAC2
HDAC3
Class II A
HDAC4
HDAC5
HDAC7
HDAC9
Class II B
HDAC6
HDAC10
Class IV
HDAC11
ClassIII
SIRT1
SIRT2
SIRT3
SIRT4
SIRT5
SIRT6
SIRT7

## Sheet: histone deacetilase complexes
SIN3 COMPLEX		The Role of Histone Protein Acetylation in Regulating Endothelial Function Zhi Fang1,2
HDAC1
HDAC2
RBBP4
RBBP7
SIN3A
SIN3B
SDS3
ING2
SAP18
SAP30
SHIP COMPLEX
HDAC1
SHIP
HSPA2
KCTD19
NURD COMPLEX
CHD3
CHD4
CHD5
GATAD2A
GATAD2B
MBD2
MBD3
HDAC1
HDAC2
CDK2AP1
NCOR/SMRT COMPLEX
NCOR1
NCOR2
TBL1X
HDAC3
GPS2
CoREST COMPLEX
HDAC1
HDAC2
RCOR1
LSD1
PHF21A
CIBF
MiDAC complex
DNTTIP1
MIDEAS
HDAC1
HDAC2
