# Supplementary material for: Histone and Histone Acetylation-Related Alterations of Gene Expression in Uninvolved Psoriatic Skin and Their Effects on Cell Proliferation, Differentiation, and Immune Responses
Source: Int J Mol Sci. 2023 Sep 26;24(19):14551. doi: 10.3390/ijms241914551 (PMC10572426; doi:10.3390/ijms241914551)
Supplement: Supplementary file 1 [file ijms-24-14551-s001.zip › Supplementary Table S2.xlsx]

## Sheet: Supplementary Table S2
gene	transcript	transcript_type	log2fc_LvsH	FDR_LvsH	log2fc_NLvsH	FDR_NLvsH
ACTB	ENST00000473257.1|ENSG00000075624.13|OTTHUMG00000023268.7|OTTHUMT00000324029.1|ACTB-209|ACTB|556|processed_transcript|	processed_transcript	0.188141	0.755424	1.71867	0.00643297
ACTB	ENST00000493945.5|ENSG00000075624.13|OTTHUMG00000023268.7|OTTHUMT00000324022.1|ACTB-213|ACTB|1236|retained_intron|	retained_intron	0.00402075	0.995027	1.83332	0.00104546
ANP32E	ENST00000436748.6|ENSG00000143401.14|OTTHUMG00000012547.5|OTTHUMT00000387925.1|ANP32E-203|ANP32E|1339|protein_coding|	protein_coding	1.11672	0.00186283	-2.06303	0.0308499
BRD8	ENST00000418329.5|ENSG00000112983.17|OTTHUMG00000129204.7|OTTHUMT00000318444.1|BRD8-205|BRD8|2912|protein_coding|	protein_coding	-0.96516	0.412734	2.70785	0.00898199
CHAF1A	ENST00000587368.1|ENSG00000167670.15|OTTHUMG00000181922.5|OTTHUMT00000459330.1|CHAF1A-204|CHAF1A|564|processed_transcript|	processed_transcript	0.101002	0.895591	1.75074	0.0118922
CHD4	ENST00000536999.1|ENSG00000111642.14|OTTHUMG00000169164.2|OTTHUMT00000402639.1|CHD4-206|CHD4|318|processed_transcript|	processed_transcript	0.404422	0.31723	1.32196	0.00558693
CTBP1	ENST00000504092.5|ENSG00000159692.15|OTTHUMG00000089259.9|OTTHUMT00000359466.1|CTBP1-205|CTBP1|920|protein_coding|	protein_coding	0.415599	0.635242	1.92723	0.0430416
CTBP1	ENST00000514596.1|ENSG00000159692.15|OTTHUMG00000089259.9|OTTHUMT00000359472.1|CTBP1-215|CTBP1|648|retained_intron|	retained_intron	-0.102913	0.925118	3.25348	7.98137e-05
ELP3	ENST00000523357.5|ENSG00000134014.16|OTTHUMG00000102124.3|OTTHUMT00000376303.1|ELP3-215|ELP3|874|protein_coding|	protein_coding	1.09758	0.0780803	1.86917	0.0217388
GATAD2A	ENST00000609040.5|ENSG00000167491.17|OTTHUMG00000152541.10|OTTHUMT00000326681.2|GATAD2A-213|GATAD2A|1652|nonsense_mediated_decay|	nonsense_mediated_decay	1.28226	0.000621422	1.33303	0.0120633
GPS2	ENST00000571695.1|ENSG00000132522.15|OTTHUMG00000102198.9|OTTHUMT00000440728.1|GPS2-206|GPS2|563|retained_intron|	retained_intron	-0.607189	0.347083	-3.19587	0.000633407
GPS2	ENST00000570780.5|ENSG00000132522.15|OTTHUMG00000102198.9|OTTHUMT00000440689.1|GPS2-203|GPS2|1238|protein_coding|	protein_coding	1.06288	0.173993	2.13244	0.027063
H2AFY	ENST00000510038.1|ENSG00000113648.16|OTTHUMG00000129141.3|OTTHUMT00000371703.1|H2AFY-215|H2AFY|1314|protein_coding|	protein_coding	2.5603	0.0001077	2.74392	0.0016869
H2AFY	ENST00000304332.8|ENSG00000113648.16|OTTHUMG00000129141.3|OTTHUMT00000371702.1|H2AFY-201|H2AFY|1881|protein_coding|	protein_coding	1.1436	2.33936e-34	-0.359628	0.00205538
H2AFY	ENST00000504197.5|ENSG00000113648.16|OTTHUMG00000129141.3|OTTHUMT00000372533.1|H2AFY-206|H2AFY|498|retained_intron|	retained_intron	0.678346	0.320018	2.66363	2.31341e-05
H2AFZ	ENST00000529158.5|ENSG00000164032.11|OTTHUMG00000131048.4|OTTHUMT00000388936.1|H2AFZ-206|H2AFZ|726|processed_transcript|	processed_transcript	-1.16209	0.222496	-3.66561	0.0479524
H2AFZ	ENST00000527366.1|ENSG00000164032.11|OTTHUMG00000131048.4|OTTHUMT00000388937.1|H2AFZ-205|H2AFZ|435|retained_intron|	retained_intron	1.73172	0.00969812	2.25401	0.0110036
H3F3A	ENST00000366816.5|ENSG00000163041.9|OTTHUMG00000037507.1|OTTHUMT00000091326.1|H3F3A-204|H3F3A|799|protein_coding|	protein_coding	0.00700904	0.991666	2.30686	2.48272e-06
H3F3B	ENST00000589599.5|ENSG00000132475.10|OTTHUMG00000179842.3|OTTHUMT00000448506.1|H3F3B-208|H3F3B|576|protein_coding|	protein_coding	0.631399	0.231883	1.60054	0.0174491
HDAC11	ENST00000458642.5|ENSG00000163517.14|OTTHUMG00000129800.8|OTTHUMT00000318586.2|HDAC11-216|HDAC11|574|processed_transcript|	processed_transcript	-0.149228	0.832573	1.6427	0.010151
HDAC11	ENST00000425430.5|ENSG00000163517.14|OTTHUMG00000129800.8|OTTHUMT00000318581.2|HDAC11-210|HDAC11|1021|nonsense_mediated_decay|	nonsense_mediated_decay	1.15679	0.146835	2.75649	0.002016
HDAC3	ENST00000523088.5|ENSG00000171720.9|OTTHUMG00000129629.5|OTTHUMT00000375279.2|HDAC3-216|HDAC3|699|protein_coding|	protein_coding	1.12412	0.0621959	1.82394	0.0370721
HDAC3	ENST00000459727.5|ENSG00000171720.9|OTTHUMG00000129629.5|OTTHUMT00000318608.1|HDAC3-202|HDAC3|524|processed_transcript|	processed_transcript	0.714049	0.0209482	1.39235	0.000315114
HDAC4	ENST00000487617.5|ENSG00000068024.16|OTTHUMG00000133344.7|OTTHUMT00000326235.1|HDAC4-209|HDAC4|819|retained_intron|	retained_intron	0.397288	0.448642	1.75545	0.000507246
HDAC5	ENST00000592385.5|ENSG00000108840.15|OTTHUMG00000181806.2|OTTHUMT00000457688.1|HDAC5-211|HDAC5|2601|retained_intron|	retained_intron	1.77053	0.0331153	2.59634	0.0104669
HDAC6	ENST00000376619.6|ENSG00000094631.18|OTTHUMG00000034496.5|OTTHUMT00000318628.1|HDAC6-203|HDAC6|4179|protein_coding|	protein_coding	0.617267	0.327206	2.06523	0.00284654
HDAC8	ENST00000415409.5|ENSG00000147099.19|OTTHUMG00000021814.4|OTTHUMT00000057204.2|HDAC8-211|HDAC8|913|protein_coding|	protein_coding	1.14975	0.00084631	-1.63696	0.0421209
HIST2H2AA3	ENST00000369159.2|ENSG00000203812.2|OTTHUMG00000188678.1|OTTHUMT00000477885.1|HIST2H2AA3-201|HIST2H2AA3|549|protein_coding|	protein_coding	0.995459	0.370389	2.91236	0.00933307
HIST2H4A	ENST00000578186.2|ENSG00000270882.2|OTTHUMG00000012189.8|OTTHUMT00000477881.1|HIST2H4A-201|HIST2H4A|583|protein_coding|	protein_coding	0.0430021	0.939067	1.5683	0.000615236
HSPA2	ENST00000554883.1|ENSG00000126803.9|OTTHUMG00000141311.4|OTTHUMT00000411969.1|HSPA2-203|HSPA2|457|processed_transcript|	processed_transcript	1.17014	0.117902	3.01542	5.80327e-05
ING3	ENST00000497502.1|ENSG00000071243.15|OTTHUMG00000141270.3|OTTHUMT00000318627.1|ING3-206|ING3|698|retained_intron|	retained_intron	-0.72483	0.140459	-1.83367	0.0178976
KANSL1	ENST00000639150.1|ENSG00000120071.13|OTTHUMG00000178026.9|OTTHUMT00000492449.1|KANSL1-223|KANSL1|1815|protein_coding|	protein_coding	0.468125	0.436031	1.57004	0.0202896
KAT5	ENST00000525600.1|ENSG00000172977.12|OTTHUMG00000166617.4|OTTHUMT00000390922.1|KAT5-205|KAT5|512|retained_intron|	retained_intron	-0.486866	0.325628	-1.93121	0.00870864
MBIP	ENST00000603139.1|ENSG00000151332.18|OTTHUMG00000140222.4|OTTHUMT00000410119.1|MBIP-204|MBIP|702|protein_coding|	protein_coding	-0.970882	0.102272	-2.35789	0.00857075
MCRS1	ENST00000547182.1|ENSG00000187778.13|OTTHUMG00000169620.5|OTTHUMT00000405105.1|MCRS1-204|MCRS1|724|processed_transcript|	processed_transcript	0.270338	0.689321	2.64312	3.11501e-06
MTA1	ENST00000331320.11|ENSG00000182979.17|OTTHUMG00000150362.36|OTTHUMT00000317849.34|MTA1-201|MTA1|2876|protein_coding|	protein_coding	0.0811157	0.909742	1.6916	0.041523
MYBBP1A	ENST00000381556.6|ENSG00000132382.14|OTTHUMG00000090747.3|-|MYBBP1A-202|MYBBP1A|4104|protein_coding|	protein_coding	1.31714	4.24218e-11	0.703905	0.0187183
MYD88	ENST00000495303.5|ENSG00000172936.12|OTTHUMG00000131083.4|OTTHUMT00000342700.1|MYD88-211|MYD88|976|protein_coding|	protein_coding	2.73521	1.99199e-06	2.36489	0.00480968
NAA40	ENST00000534965.5|ENSG00000110583.12|OTTHUMG00000167784.3|OTTHUMT00000396265.1|NAA40-203|NAA40|958|nonsense_mediated_decay|	nonsense_mediated_decay	0.0988564	0.883081	1.8563	0.00602279
NPM1	ENST00000523339.1|ENSG00000181163.13|OTTHUMG00000130465.4|OTTHUMT00000372227.1|NPM1-210|NPM1|268|retained_intron|	retained_intron	0.665697	1.40268e-05	-1.07692	2.19085e-05
NPM1	ENST00000393820.2|ENSG00000181163.13|OTTHUMG00000130465.4|OTTHUMT00000372224.1|NPM1-203|NPM1|1598|protein_coding|	protein_coding	1.00608	2.03759e-31	-0.264022	0.0224278
PWP1	ENST00000552760.5|ENSG00000136045.11|OTTHUMG00000169913.2|OTTHUMT00000406541.1|PWP1-205|PWP1|851|nonsense_mediated_decay|	nonsense_mediated_decay	2.96559	5.10798e-06	2.69612	0.00180516
RBBP4	ENST00000525506.1|ENSG00000162521.18|OTTHUMG00000007998.13|OTTHUMT00000389774.1|RBBP4-216|RBBP4|501|retained_intron|	retained_intron	0.684411	0.375617	1.8115	0.0340042
SET	ENST00000372688.8|ENSG00000119335.16|OTTHUMG00000020755.4|-|SET-203|SET|801|protein_coding|	protein_coding	-0.170077	0.901231	4.57717	1.46146e-07
SIN3A	ENST00000394949.8|ENSG00000169375.15|OTTHUMG00000142834.4|OTTHUMT00000420307.1|SIN3A-203|SIN3A|4930|protein_coding|	protein_coding	0.954417	0.362567	3.17115	0.00336563
SIRT5	ENST00000379250.10|ENSG00000124523.15|OTTHUMG00000014278.3|OTTHUMT00000470970.2|SIRT5-202|SIRT5|3727|nonsense_mediated_decay|	nonsense_mediated_decay	-1.22354	0.0687278	-2.25928	0.0307189
SIRT6	ENST00000600540.5|ENSG00000077463.14|OTTHUMG00000181847.4|OTTHUMT00000457933.2|SIRT6-211|SIRT6|1407|retained_intron|	retained_intron	0.244419	0.631418	1.5654	0.00123919
SIRT6	ENST00000596298.5|ENSG00000077463.14|OTTHUMG00000181847.4|OTTHUMT00000458000.1|SIRT6-207|SIRT6|717|retained_intron|	retained_intron	0.440198	0.479875	1.73423	0.009945
SPHK2	ENST00000599748.5|ENSG00000063176.15|OTTHUMG00000183318.3|OTTHUMT00000466164.1|SPHK2-210|SPHK2|2683|protein_coding|	protein_coding	-0.306838	0.673783	1.76528	0.0315502
SPHK2	ENST00000245222.8|ENSG00000063176.15|OTTHUMG00000183318.3|OTTHUMT00000466153.1|SPHK2-201|SPHK2|2963|protein_coding|	protein_coding	-0.344307	0.673644	2.07913	0.0227817
TADA2B	ENST00000512388.1|ENSG00000173011.11|OTTHUMG00000159983.4|OTTHUMT00000358688.1|TADA2B-204|TADA2B|1343|protein_coding|	protein_coding	0.578301	0.146573	1.1406	0.0294622
TADA2B	ENST00000506692.1|ENSG00000173011.11|OTTHUMG00000159983.4|OTTHUMT00000358690.3|TADA2B-202|TADA2B|558|protein_coding|	protein_coding	-0.0209665	0.97363	1.72301	0.00543054
TBL1X	ENST00000217964.11|ENSG00000101849.15|OTTHUMG00000021117.3|OTTHUMT00000055709.2|TBL1X-201|TBL1X|5871|protein_coding|	protein_coding	0.171464	0.8798	2.12077	0.0381242
UBN1	ENST00000589191.1|ENSG00000118900.14|OTTHUMG00000129531.5|OTTHUMT00000460409.1|UBN1-207|UBN1|705|nonsense_mediated_decay|	nonsense_mediated_decay	-0.0953506	0.906907	2.53843	6.96204e-05
VPS72	ENST00000463470.1|ENSG00000163159.12|OTTHUMG00000012345.10|OTTHUMT00000258040.1|VPS72-203|VPS72|277|processed_transcript|	processed_transcript	-0.093101	0.885934	-1.9839	0.018124
WBP2	ENST00000591831.5|ENSG00000132471.11|OTTHUMG00000179896.2|OTTHUMT00000448864.1|WBP2-216|WBP2|1406|nonsense_mediated_decay|	nonsense_mediated_decay	-0.721271	0.0928874	-2.32599	0.00225856
WBP2	ENST00000590221.5|ENSG00000132471.11|OTTHUMG00000179896.2|OTTHUMT00000448865.1|WBP2-213|WBP2|1745|protein_coding|	protein_coding	-0.356803	0.624043	2.01062	0.00455453
